# Supplementary material for: Prognostic value of sirtuin family members and experimental verification identify SIRT5 as diagnostic biomarkers in clear cell renal cell carcinoma
Source: PeerJ. 2023 Apr 19;11:e15154. doi: 10.7717/peerj.15154 (PMC10122460; doi:10.7717/peerj.15154)
Supplement: Supplemental Information 1 [file peerj-11-15154-s001.xls]

## Sheet: Detailed pathological data
Organization type	Surgery date (year/month/day)	Outcome (suvive or death)	End time of follow-up (year/month/day)	Follow up time(month)	issue code	organ	sex	Age	primary organ	metastasis	Pathological typing	Pathological grade	Tumor size (cm)	T	N	M	Clinical staging of the seventh edition of AJCC	Tissue coding	HKid-CRC180Sur-01	immunohistochemical score
Carcino/adjacent tissue	2006/10	death	2007-04-28	6	F01A0199	kidney	Female	66	YES	NO	ccRCC	Grage Ⅲ	7.5*6*6	T2	N0	M0	2	F01A0199	yes	2
Carcino/adjacent tissue	2006-10-11	survive	2015-08-31	106	F01A0200	kidney	male	29	YES	NO	ccRCC	Grage Ⅱ	4*3.7*3.5	T2	N0	M0	2	F01A0200	yes	4
Carcino/adjacent tissue	2006-10-24	survive	2015-08-31	106	F01A0202	kidney	Female	66	YES	NO	ccRCC	Grage Ⅱ	10*6*5	T2	N0	M0	2	F01A0202	yes	2
Carcino/adjacent tissue	2006-10-24	survive	2013-10-01	——	F01A0204	kidney	male	34	YES	NO	ccRCC	Grage Ⅱ	2.5*2.5*2.4	T2	N0	M0	2	F01A0204		9
Carcino/adjacent tissue	2006/10	survive	2015-08-31	106	F01A0207	kidney	male	71	YES	NO	ccRCC	Grage Ⅱ	8*7.5*6.5	T2	N0	M0	2	F01A0207	yes	12
Carcino/adjacent tissue	2006-11-01	survive	2015-08-31	105	F01A0209	kidney	male	62	YES	NO	ccRCC	Grage Ⅰ	5.5*4*5	T1	——	M0	——	F01A0209	yes	12
Carcino/adjacent tissue	2006-11-03	death	2009-07-15	8	F01A0220	kidney	male	79	YES	NO	ccRCC	Grage Ⅰ	4*3*3	T1	N0	M0	1	F01A0220	yes	12
Carcino/adjacent tissue	2006/11	death	2012-06-27	67	F01A0223	kidney	Female	73	YES	NO	ccRCC	Grage Ⅱ-Ⅲ	8*7*6	T2	N0	M0	2	F01A0223	yes	2
Carcino/adjacent tissue	2006/11	survive	2015-08-31	105	F01A0224	kidney	male	44	YES	NO	ccRCC	Grage Ⅰ	3*2.5*2	T1	N0	M0	1	F01A0224	yes	12
Carcino/adjacent tissue	2006-11-24	survive	2015-08-31	105	F01A0226	kidney	Female	52	YES	NO	ccRCC	Grage Ⅰ	2.5*2.5*2	T2	N0	M0	2	F01A0226	yes	4
Carcino/adjacent tissue	2006-11-29	survive	2015-08-31	105	F01A0228	kidney	Female	73	YES	NO	ccRCC	Grage Ⅰ-Ⅱ	3.5*2*2	T2	N0	M0	2	F01A0228	yes	12
Carcino/adjacent tissue	2006-11-29	survive	2015-08-31	105	F01A0229	kidney	male	73	YES	NO	ccRCC	Grage Ⅰ-Ⅱ	2*1.7*1.5	T2	N0	M0	2	F01A0229	yes	12
Carcino/adjacent tissue	2006-12-01	survive	2013-10-01	——	F01A0230	kidney	male	55	YES	NO	ccRCC	Grage Ⅰ-Ⅱ	2*2*1.5	T2	N0	M0	2	F01A0230	yes	12
Carcino/adjacent tissue	2006-12-01	survive	2013-10-01	——	F01A0233	kidney	male	60	YES	NO	ccRCC	Grage Ⅰ	4*3.5*2.5	T1	N0	M0	1	F01A0233		12
Carcino/adjacent tissue	2006/11	survive	2015-08-31	105	F01A0234	kidney	male	44	YES	NO	ccRCC	Grage Ⅱ	7*6.5*6	T2	N0	M0	2	F01A0234		12
Carcino/adjacent tissue	2006/12	death	2012-01-05	61	F01A0258	kidney	male	78	YES	NO	ccRCC	Grage Ⅱ	7*5*4	T1	N0	M0	1	F01A0258	yes	2
Carcino/adjacent tissue	2006-12-14	death	2007-02-03	2	F01A0259	kidney	male	55	YES	NO	ccRCC	Grage Ⅰ	4*3.5*3.5	T2	N0	M0	2	F01A0259	yes	2
Carcino/adjacent tissue	2006/12	survive	2015-08-31	104	F01A0260	kidney	Female	49	YES	NO	ccRCC	GrageⅠ	3*2.5*1.5；5*3*2.5	T1	N0	M0	1	F01A0260	yes	8
Carcino/adjacent tissue	2007-01-05	death	2007-09-29	8	F01A0265	kidney	male	58	YES	NO	ccRCC	Grage Ⅰ	4.5*4*4	T1	——	M0	——	F01A0265		12
Carcino/adjacent tissue	2007/1	survive	2015-08-31	103	F01A0266	kidney	male	61	YES	NO	ccRCC	Grage Ⅰ	3.5*3*1	T1	N0	M0	1	F01A0266	yes	8
Carcino/adjacent tissue	2007/1	death	2007-09-03	8	F01A0278	kidney	Female	67	YES	NO	ccRCC	Grage Ⅱ-Ⅲ	4*4*3	T2	N1	M0	3	F01A0278	yes	4
Carcino/adjacent tissue	2007/1	survive	2015-08-31	103	F01A0279	kidney	male	52	YES	NO	ccRCC	Grage Ⅱ	10*10*8.2	T1	N0	M0	1	F01A0279	yes	12
Carcino/adjacent tissue	2007-01-19	death	2013-01-11	72	F01A0282	kidney	male	62	YES	NO	ccRCC	Grage Ⅱ-Ⅲ	14*10*7	T1	N0	M0	1	F01A0282	yes	12
Carcino/adjacent tissue	2007-01-24	survive	2015-08-31	103	F01A0283	kidney	Female	44	YES	NO	ccRCC	Grage Ⅰ-Ⅱ	10*10*8.2	T1	N0	M0	1	F01A0283	yes	12
Carcino/adjacent tissue	2007-01-26	survive	2015-08-31	103	F01A0285	kidney	male	57	YES	NO	ccRCC	Grage Ⅱ-Ⅲ	5.5*4.5*3.5	T3	N0	M0	3	F01A0285	yes	9
Carcino/adjacent tissue	2007/2	death	2007-10-19	8	F01A0288	kidney	Female	74	YES	NO	ccRCC	Grage Ⅲ	0.2-2.5*1.5*1	T3	N0	M0	3	F01A0288	yes	2
Carcino/adjacent tissue	2007-03-02	survive	2015-08-31	101	F01A0291	kidney	Female	60	YES	NO	ccRCC	Grage Ⅲ	7*6*4.5	T1	——	M0	——	F01A0291	yes	6
Carcino/adjacent tissue	2007/3	survive	2015-08-31	101	F01A0302	kidney	Female	57	YES	NO	ccRCC	Grage Ⅰ	4*3.5*3	T1	N0	M0	1	F01A0302	yes	4
Carcino/adjacent tissue	2007/3	survive	2015-08-31	101	F01A0303	kidney	Female	48	YES	NO	ccRCC	Grage Ⅱ	2.5*2.5*2.5	T1	N0	M0	1	F01A0303	yes	12
Carcino/adjacent tissue	2007-03-01	survive	2015-08-31	101	F01A0304	kidney	male	71	YES	NO	ccRCC	Grage Ⅱ-Ⅲ	9*8*8	T1	N0	M0	1	F01A0304		12
Carcino/adjacent tissue	2007-03-30	survive	2015-08-31	101	F01A0306	kidney	male	72	YES	NO	ccRCC	Grage Ⅰ-Ⅱ	4*3*2.5；2.5*2*1.5	T1	N0	M0	1	F01A0306	yes	12
Carcino/adjacent tissue	2007-02-14	death	2009-12-11	34	F01A0311	kidney	male	65	YES	NO	ccRCC	Grage Ⅰ-Ⅲ	7*7*4	T2	N0	M0	2	F01A0311	yes	12
Carcino/adjacent tissue	2007-04-11	death	2013-12-14	79	F01A0333	kidney	Female	78	YES	NO	ccRCC	Grage Ⅰ	3.8*3.5*3	T1	N0	M0	1	F01A0333	yes	12
Carcino/adjacent tissue	2007/4	survive	2015-08-31	100	F01A0334	kidney	Female	44	YES	NO	ccRCC	Grage Ⅰ	7*5*4	T2	N0	M0	2	F01A0334	yes	12
Carcino/adjacent tissue	2007/4	survive	2015-08-31	100	F01A0336	kidney	male	60	YES	NO	ccRCC	Grage Ⅰ-Ⅱ	3.5*2.5*2	T1	N0	M0	1	F01A0336	yes	2
Carcino/adjacent tissue	2007-04-09	death	2012-07-31	63	F01A0339	kidney	male	37	YES	NO	ccRCC	Grage Ⅲ	9*6*4	T2	N0	M0	2	F01A0339	yes	4
Carcino/adjacent tissue	2007/4	survive	2015-08-31	100	F01A0342	kidney	male	50	YES	NO	ccRCC	Grage Ⅰ-Ⅱ	2.4*2*2	T1	N0	M0	1	F01A0342	yes	1
Carcino/adjacent tissue	2007-04-30	survive	2015-08-31	100	F01A0344	kidney	male		YES	NO	ccRCC	Grage Ⅱ	3*2.5*1.5	T1	N0	M0	1	F01A0344		4
Carcino/adjacent tissue	2007-04-30	survive	2015-08-31	100	F01A0345	kidney	Female	42	YES	NO	ccRCC	Grage Ⅲ	4.5*4*3.5	T1	N0	M0	1	F01A0345		12
Carcino/adjacent tissue	2007/5	death	2007-08-31	3	F01A0347	kidney	male	57	YES	NO	ccRCC	Grage Ⅲ	11*8*8	T3	N0	M0	3	F01A0347	yes	12
Carcino/adjacent tissue	2007/5	death	2011-02-26	45	F01A0362	kidney	male	67	YES	NO	ccRCC	Grage Ⅱ	3.5*3.5*3	T1	N0	M0	1	F01A0362	yes	4
Carcino/adjacent tissue	2007/5	survive	2015-08-31	99	F01A0366	kidney	Female	57	YES	NO	ccRCC	Grage Ⅰ-Ⅱ	5*5*3	T1	N0	M0	1	F01A0366	yes	12
Carcino/adjacent tissue	2007/5	survive	2015-08-31	99	F01A0371	kidney	male	65	YES	NO	ccRCC	Grage Ⅰ-Ⅱ	5*4.5*4	T1	N0	M0	1	F01A0371	yes	12
Carcino/adjacent tissue	2007/5	death	2011-05-12	48	F01A0372	kidney	Female	71	YES	NO	ccRCC	Grage Ⅱ	8*6*5.5	T2	N0	M0	2	F01A0372	yes	2
Carcino/adjacent tissue	2007/5	survive	2015-08-31	99	F01A0373	kidney	Female	39	YES	NO	ccRCC	Grage Ⅱ	3.5*3.5*3	T1	N0	M0	1	F01A0373	yes	12
Carcino/adjacent tissue	2007/5	death	2012-06-12	61	F01A0381	kidney	Female	72	YES	NO	ccRCC	Grage Ⅰ-Ⅱ	10*8*5	T2	N0	M0	2	F01A0381	yes	2
Carcino/adjacent tissue	2007/5	death	2008-01-09	8	F01A0382	kidney	male	54	YES	NO	ccRCC	Grage Ⅲ	9*8*8	T3	N0	M1	4	F01A0382	yes	4
Carcino/adjacent tissue	2007/5	survive	2015-08-31	99	F01A0384	kidney	male	55	YES	NO	ccRCC	Grage Ⅱ	9*8*7.5	T2	N0	M0	2	F01A0384	yes	12
Carcino/adjacent tissue	2007/5	death	2011-06-14	49	F01A0385	kidney	male	57	YES	NO	ccRCC	Grage Ⅰ	4*3.8*2.8	T1	N0	M0	1	F01A0385	yes	12
Carcino/adjacent tissue	2007/6	survive	2015-08-31	98	F01A0388	kidney	Female	48	YES	NO	ccRCC	Grage Ⅰ	11*9.5*5.5	T3	N0	M0	3	F01A0388	yes	12
Carcino/adjacent tissue	2007/6	death	2010-06-08	36	F01A0389	kidney	male	70	YES	NO	ccRCC	Grage Ⅲ	4*3.5*3	T1	N0	M0	1	F01A0389	yes	8
Carcino/adjacent tissue	2007/6	survive	2015-08-31	98	F01A0390	kidney	male	48	YES	NO	ccRCC	Grage Ⅲ-Ⅳ	6*4*3.5	T1	N0	M0	1	F01A0390	yes	12
Carcino/adjacent tissue	2007/6	survive	2015-08-31	98	F01A0391	kidney	male	70	YES	NO	ccRCC	Grage Ⅰ-Ⅱ	4*3.5*2.5	T1	N0	M0	1	F01A0391	yes	1
Carcino/adjacent tissue	2007/6	death	2012-05-26	59	F01A0393	kidney	male	77	YES	NO	ccRCC	Grage Ⅰ-Ⅲ	5.5*4.5*4.5	T1	N0	M0	1	F01A0393	yes	2
Carcino/adjacent tissue	2007/6	survive	2015-08-31	98	F01A0394	kidney	male	37	YES	NO	ccRCC	Grage Ⅰ-Ⅱ	4*4*3.5	T1	N0	M0	1	F01A0394	yes	8
Carcino/adjacent tissue	2007/6	survive	2015-08-31	98	F01A0397	kidney	male	57	YES	NO	ccRCC	Grage Ⅲ	10*6*6	T2	N0	M0	2	F01A0397		12
Carcino/adjacent tissue	2007/6	survive	2015-08-31	98	F01A0398	kidney	male	75	YES	NO	ccRCC	Grage Ⅱ	3*3*2	T1	N0	M0	1	F01A0398	yes	12
Carcino/adjacent tissue	2007/6	survive	2015-08-31	98	F01A0399	kidney	male	51	YES	NO	ccRCC	Grage Ⅱ	5*4*3	T1	N0	M0	1	F01A0399	yes	12
Carcino/adjacent tissue	2007/7	death	2009-07-12	24	F01A0405	kidney	male	53	YES	NO	ccRCC	Grage Ⅱ-Ⅲ	0.3-4.5*4*3.5	T2	N0	M0	2	F01A0405		12
Carcino/adjacent tissue	2007/7	death	2012-09-13	62	F01A0406	kidney	Female	82	YES	NO	ccRCC	Grage Ⅱ-Ⅲ	6.5*6.5*4	T1	N0	M0	1	F01A0406	yes	1
Carcino/adjacent tissue	2007/7	death	2010-03-03	32	F01A0408	kidney	Female	66	YES	NO	ccRCC	Grage Ⅱ	11*10*6.5	T3	N0	M1	4	F01A0408	yes	2
Carcino/adjacent tissue	2007/7	survive	2015-08-31	97	F01A0409	kidney	Female	55	YES	NO	ccRCC	Grage Ⅰ-Ⅱ	5.5*5*4	T1	N0	M0	1	F01A0409	yes	3
Carcino/adjacent tissue	2007/7	survive	2015-08-31	97	F01A0410	kidney	male	55	YES	NO	ccRCC	Grage Ⅱ	4.5*4*3.5	T1	N0	M0	1	F01A0410	yes	12
Carcino/adjacent tissue	2007/7	death	2013-01-04	66	F01A0413	kidney	Female	61	YES	NO	ccRCC	Grage Ⅲ	8.5*6.5*6	T2	N0	M0	2	F01A0413	yes	1
Carcino/adjacent tissue	2007/7	survive	2015-08-31	97	F01A0415	kidney	male	54	YES	NO	ccRCC	Grage Ⅰ	3.5*3*3	T1	N0	M0	1	F01A0415	yes	12
Carcino/adjacent tissue	2007/9	survive	2015-08-31	95	F01A0416	kidney	male	44	YES	NO	ccRCC	Grage Ⅰ-Ⅱ	5*4*4	T1	N0	M0	1	F01A0416		9
Carcino/adjacent tissue	2007/9	death	2009-03-20	18	F01A0426	kidney	male	59	YES	NO	ccRCC	Grage Ⅲ	10*7*6.5	T2	N0	M0	2	F01A0426	yes	2
Carcino/adjacent tissue	2007/9	survive	2015-08-31	95	F01A0430	kidney	male	66	YES	NO	ccRCC	Grage Ⅱ	3.3*3.2*2.5	T1	N0	M0	1	F01A0430	yes	12
Carcino/adjacent tissue	2007/9	survive	2015-08-31	95	F01A0432	kidney	Female		YES	NO	ccRCC	Grage Ⅰ-Ⅱ	7*6*4	T1	N0	M0	1	F01A0432	yes	1
Carcino/adjacent tissue	2007/10	death	2011-09-09	47	F01A0462	kidney	Female	43	YES	NO	ccRCC	Grage Ⅲ	11*9*7	T2	N0	M0	2	F01A0462	yes	2
Carcino/adjacent tissue	2007/10	death	2011-05-22	43	F01A0465	kidney	male	79	YES	NO	ccRCC	Grage Ⅰ-Ⅱ	4*3*3	T1	N0	M0	1	F01A0465	yes	2
Carcino/adjacent tissue	2007/10	survive	2015-08-31	94	F01A0466	kidney	male	71	YES	NO	ccRCC	Grage Ⅰ	5.3*5*3.5	T1	N0	M0	1	F01A0466	yes	12
Carcino/adjacent tissue	2007/11	survive	2015-08-31	93	F01A0469	kidney	male	54	YES	NO	ccRCC	Grage Ⅱ-Ⅲ	5.5*5*4	T1	N0	M0	1	F01A0469	yes	3
Carcino/adjacent tissue	2007/11	survive	2015-08-31	93	F01A0471	kidney	Female	46	YES	NO	ccRCC	Grage Ⅰ-Ⅱ	4.5*3.8*3.5	T1	N0	M0	1	F01A0471	yes	3
Carcino/adjacent tissue	2007/12	survive	2015-08-31	92	F01A0489	kidney	male	55	YES	NO	ccRCC	Grage Ⅰ	4*4*4	T1	N0	M0	1	F01A0489	yes	9
Carcino/adjacent tissue	2007/12	survive	2015-08-31	92	F01A0490	kidney	male	61	YES	NO	ccRCC	GrageⅡ	3.5*2.5*2.5	T1	N0	M0	1	F01A0490	yes	12
Carcino/adjacent tissue	2007/12	survive	2015-08-31	92	F01A0491	kidney	male	51	YES	NO	ccRCC	Grage Ⅱ	2.5*2*1.7	T1	N0	M0	1	F01A0491	yes	3
Carcino/adjacent tissue	2007/12	survive	2015-08-31	92	F01A0496	kidney	male	59	YES	NO	ccRCC	Grage Ⅱ-Ⅲ	4*3*3	T1	N0	M0	1	F01A0496		3
Carcino/adjacent tissue	2007/12	death	2008-11-12	11	F01A0497	kidney	male	68	YES	NO	ccRCC	Grage Ⅲ	7*6*6	T2	N1	M0	3	F01A0497		1
Carcino/adjacent tissue	2007/12	survive	2015-08-31	92	F01A0499	kidney	Female	70	YES	NO	ccRCC	Grage Ⅰ	3*3*2.5	T1	N0	M0	1	F01A0499	yes	6
Carcino/adjacent tissue	2007/12	survive	2015-08-31	92	F01A0522	kidney	Female	55	YES	NO	ccRCC	Grage Ⅰ	3*2.2*1.7	T1	N0	M0	1	F01A0522	yes	9
Carcino/adjacent tissue	2007/12	death	2011-09-11	45	F01A0523	kidney	male	60	YES	NO	ccRCC	Grage Ⅱ-Ⅲ	10.5*9*4.5	T2	N0	M0	2	F01A0523	yes	2
Carcino/adjacent tissue	2007/12	survive	2015-08-31	92	F01A0529	kidney	male	64	YES	NO	ccRCC	Grage Ⅰ	4.5*4.5*4	T1	N0	M0	1	F01A0529	yes	4
Carcino/adjacent tissue	2007/12	survive	2015-08-31	92	F01A0530	kidney	Female	57	YES	NO	ccRCC	Grage Ⅱ	5*4.8*4	T1	N0	M0	1	F01A0530	yes	9
Carcino/adjacent tissue	2007/12	survive	2015-08-31	92	F01A0533	kidney	male	55	YES	NO	ccRCC	Grage Ⅰ-Ⅱ	6*5*5	T1	N0	M0	1	F01A0533	yes	9
Carcino/adjacent tissue	2007/12	death	2014-01-23	73	F01A0534	kidney	Female	64	YES	NO	ccRCC	Grage Ⅱ	5*5*4	T1	N0	M0	1	F01A0534	yes	2
Carcino/adjacent tissue	2007/12	survive	2015-08-31	91	F01A0535	kidney	male	59	YES	NO	ccRCC	Grage Ⅰ	7*6*5	T1	N0	M0	1	F01A0535	yes	1
Carcino/adjacent tissue	2008/1	survive	2015-08-31	91	F01A0536	kidney	male	56	YES	NO	ccRCC	Grage Ⅰ	4.5*3.5*3.5	T1	N0	M0	1	F01A0536		6
Carcino/adjacent tissue	2008/2	survive	2015-08-31	90	F01A0559	kidney	male	70	YES	NO	ccRCC	Grage Ⅰ	2*2*1.5	T1	N0	M0	1	F01A0559	yes	6
Carcino/adjacent tissue	2008/2	death	2010-08-03	30	F01A0561	kidney	male	64	YES	NO	ccRCC	Grage Ⅱ-Ⅲ	5*4.5*3.5	T1	N0	M0	1	F01A0561	yes	2
