# Supplementary material for: Prognostic value of sirtuin family members and experimental verification identify SIRT5 as diagnostic biomarkers in clear cell renal cell carcinoma
Source: PeerJ. 2023 Apr 19;11:e15154. doi: 10.7717/peerj.15154 (PMC10122460; doi:10.7717/peerj.15154)
Supplement: Supplemental Information 2 [file peerj-11-15154-s002.xlsx]

## Sheet: table
Gene	Cytoband	Altered group	Unaltered group	Altered group	Unaltered group	Log Ratio	p-Value	q-Value	Higher expression in
SLC6A3	5p15.33	6.81	10.42	4.8	3.12	-3.61	1.212e-05	0.001441	Unaltered group
CA9	9p13.3	9.02	12.11	4.9	1.91	-3.09	0.000147	0.004814	Unaltered group
CP	3q24-q25.1	9.28	12.29	4.29	2.73	-3.01	3.572e-05	0.002397	Unaltered group
FABP7	6q22.31	6.75	9.57	5.17	3.85	-2.82	0.0009209	0.0128	Unaltered group
ENPP3	6q23.2	9.58	12.01	4.16	2.19	-2.43	0.0003856	0.008066	Unaltered group
KISS1R	19p13.3	3.77	6.17	3.01	2.62	-2.4	5.434e-06	0.0009726	Unaltered group
ANGPTL4	19p13.2	11.39	13.74	3.62	1.53	-2.35	0.0001	0.004004	Unaltered group
COL23A1	5q35.3	9.11	11.44	4.01	1.83	-2.33	0.0003993	0.008221	Unaltered group
NDUFA4L2	12q13.3	12.24	14.51	3.34	1.7	-2.27	5.59e-05	0.003058	Unaltered group
PRIMA1	14q32.12	5.58	7.8	3.66	3.15	-2.22	0.0002987	0.007042	Unaltered group
REG1A	2p12	5.43	7.56	4.13	3.51	-2.13	0.001763	0.0184	Unaltered group
CYP4A11	1p33	6.33	8.45	4.65	3.55	-2.12	0.004884	0.0338	Unaltered group
FABP6	5q33.3	5.46	7.56	3.17	2.12	-2.1	8.329e-05	0.003763	Unaltered group
GSTA2	6p12.2	7.87	9.97	4.05	2.89	-2.1	0.001557	0.0172	Unaltered group
CLEC18C	16q22.1	6.34	8.41	3.22	2.33	-2.07	0.0001321	0.004581	Unaltered group
CYP2J2	1p32.1	8.55	10.62	4.06	2.34	-2.07	0.001716	0.0182	Unaltered group
SLC17A4	6p22.2	6.65	8.69	3.53	2.73	-2.05	0.0004892	0.008964	Unaltered group
DNAH11	7p15.3	6.42	8.42	3.85	2.66	-2	0.001522	0.017	Unaltered group
SLC28A1	15q25.3	9	10.97	3.93	1.85	-1.97	0.001941	0.0194	Unaltered group
LRP2	2q31.1	10.59	12.56	4.55	2.57	-1.97	0.006777	0.0417	Unaltered group
LINC00887	3q29	6.79	8.75	3.58	1.88	-1.96	0.000815	0.0119	Unaltered group
TNFAIP6	2q23.3	7.35	9.3	3.23	1.98	-1.95	0.0002672	0.006567	Unaltered group
CDH4	20q13.33	4.12	6.06	3.2	2.9	-1.95	0.0002947	0.006966	Unaltered group
AOC1	7q36.1	9.32	11.26	3.79	2.86	-1.94	0.001799	0.0185	Unaltered group
TMEM130	7q22.1	5.94	7.87	2.72	2.7	-1.93	3.753e-05	0.002434	Unaltered group
ALPK2	18q21.31-q21.32	8.88	10.8	3.74	1.62	-1.91	0.001586	0.0174	Unaltered group
GSTA1	6p12.2	9.56	11.46	4.46	2.64	-1.9	0.007959	0.0461	Unaltered group
CLEC18B	16q23.1	7.95	9.82	2.94	2.07	-1.86	0.0001532	0.004889	Unaltered group
SLC2A5	1p36.23	8.69	10.55	3.37	1.73	-1.86	0.0007464	0.0115	Unaltered group
CDHR5	11p15.5	9.07	10.93	4.14	2.43	-1.86	0.005216	0.0352	Unaltered group
CREB3L3	19p13.3	5.84	7.68	3.82	2.54	-1.84	0.003015	0.0253	Unaltered group
IRX3	16q12.2	8.24	10.07	2.89	1.18	-1.83	0.0001436	0.004765	Unaltered group
SLC17A3	6p22.2	8.98	10.81	4.54	2.94	-1.82	0.0122	0.0598	Unaltered group
FOSB	19q13.32	8.33	10.14	2.5	2.45	-1.81	2.848e-05	0.002161	Unaltered group
ALKAL2	2p25.3	5.55	7.35	2.87	2.24	-1.81	0.000178	0.005332	Unaltered group
EGLN3	14q13.1	11.52	13.32	2.91	1.31	-1.8	0.0001968	0.005656	Unaltered group
KCNK3	2p23.3	8.16	9.95	3.16	1.92	-1.79	0.0006062	0.0103	Unaltered group
CD70	19p13.3	7.12	8.91	3.94	2.39	-1.79	0.004847	0.0336	Unaltered group
CLEC18A	16q22.1	8.53	10.32	2.65	1.94	-1.78	6.961e-05	0.003436	Unaltered group
PNCK	Xq28	7.79	9.57	3.69	2.87	-1.78	0.003051	0.0255	Unaltered group
ACSM2B	16p12.3	8.67	10.44	4.32	2.59	-1.78	0.009982	0.0528	Unaltered group
LOX	5q23.1	10.04	11.82	2.73	1.85	-1.77	0.0001145	0.004235	Unaltered group
SEMA5B	3q21.1	9.68	11.45	2.93	1.39	-1.76	0.0002777	0.006728	Unaltered group
HHLA2	3q13.13	7.89	9.65	3.99	2.44	-1.76	0.00611	0.0389	Unaltered group
GALNT14	2p23.1	10.31	12.06	3.17	1.19	-1.75	0.000732	0.0114	Unaltered group
SLC5A12	11p14.2	7.64	9.39	3.84	3.03	-1.75	0.004975	0.0341	Unaltered group
NAT8	2p13.1	9.73	11.48	4.03	2.66	-1.75	0.006955	0.0423	Unaltered group
LGI4	19q13.12	7.71	9.46	2.91	2.24	-1.74	0.000325	0.007357	Unaltered group
SLC6A13	12p13.33	9.09	10.82	3.35	2.46	-1.74	0.001549	0.0172	Unaltered group
CUBN	10p13	10.62	12.36	3.75	2.08	-1.74	0.00403	0.03	Unaltered group
TUBA3D	2q21.1	2.89	4.62	2.42	3.19	-1.73	4.632e-05	0.002763	Unaltered group
UGT1A9	2q37.1	8.95	10.67	4.02	2.57	-1.72	0.007688	0.0451	Unaltered group
ADCY8	8q24.22	2.28	3.98	2.56	3.27	-1.71	0.0001219	0.004393	Unaltered group
MAP7D2	Xp22.12	6.13	7.84	3.51	2.58	-1.71	0.002745	0.024	Unaltered group
UPB1	22q11.23	6.97	8.67	3.28	1.97	-1.7	0.001525	0.017	Unaltered group
CDH2	18q12.1	9.11	10.82	3.44	1.35	-1.7	0.002097	0.0202	Unaltered group
MYEOV	11q13.3	4.9	6.6	3.83	3.05	-1.7	0.00621	0.0392	Unaltered group
ASPG	14q32.33	4.49	6.16	3.39	3.13	-1.67	0.002836	0.0245	Unaltered group
GRIK3	1p34.3	7.08	8.73	2.51	1.82	-1.66	9.196e-05	0.003879	Unaltered group
SORCS3	10q25.1	4.14	5.8	3.74	3.71	-1.66	0.006963	0.0423	Unaltered group
UGT2A3	4q13.2	9.09	10.73	4.06	2.34	-1.64	0.0111	0.0564	Unaltered group
NPTX2	7q22.1	8.78	10.41	3.1	2.6	-1.63	0.001471	0.0167	Unaltered group
BBOX1	11p14.2	9.31	10.93	3.91	2.22	-1.62	0.009463	0.0509	Unaltered group
STC2	5q35.2	9.74	11.36	2.09	1.17	-1.61	7.496e-06	0.001188	Unaltered group
PCSK6	15q26.3	9.52	11.13	2.94	1.69	-1.61	0.0008669	0.0124	Unaltered group
GRIA4	11q22.3	4.17	5.78	3.51	3.47	-1.61	0.00528	0.0354	Unaltered group
ACSM2A	16p12.3	9.45	11.06	4.3	2.5	-1.61	0.0183	0.0776	Unaltered group
NEGR1	1p31.1	5.4	6.98	2.31	2.29	-1.59	6.191e-05	0.003231	Unaltered group
SCGN	6p22.2	6.25	7.84	4.05	2.99	-1.59	0.0142	0.0655	Unaltered group
GGT1	22q11.23	9.82	11.4	3.44	1.43	-1.58	0.004041	0.0301	Unaltered group
SLC5A10	17p11.2	7.67	9.25	3.53	2.46	-1.58	0.005543	0.0365	Unaltered group
MYO3A	10p12.1	5.8	7.37	3.1	1.64	-1.57	0.001784	0.0185	Unaltered group
MCHR1	22q13.2	4.52	6.09	3.18	2.83	-1.57	0.002632	0.0234	Unaltered group
GDF6	8q22.1	6.16	7.72	2.39	1.94	-1.56	0.0001117	0.004176	Unaltered group
RNF186	1p36.13	6.33	7.88	3.04	2.26	-1.56	0.001737	0.0183	Unaltered group
CLRN3	10q26.2	7.73	9.29	3.65	2.07	-1.56	0.007617	0.0448	Unaltered group
EPHA7	6q16.1	7.66	9.22	3.71	2.18	-1.56	0.008719	0.0485	Unaltered group
OPCML	11q25	4.18	5.73	2.61	2.52	-1.55	0.0004114	0.008262	Unaltered group
GLYAT	11q12.1	8.01	9.56	3.87	2.31	-1.55	0.012	0.0592	Unaltered group
GRIN2A	16p13.2	5.24	6.79	2.61	2.39	-1.54	0.0004229	0.0084	Unaltered group
TRPA1	8q21.11	5.04	6.58	2.89	1.79	-1.54	0.001137	0.0145	Unaltered group
TRIM15	6p22.1	5.62	7.16	3.14	1.94	-1.54	0.002493	0.0225	Unaltered group
DPYS	8q22.3	7.89	9.43	3.67	2.14	-1.54	0.008587	0.0481	Unaltered group
SLC5A8	12q23.1-q23.2	5.77	7.3	4.17	3.53	-1.54	0.0218	0.0864	Unaltered group
DDC	7p12.2-p12.1	7.75	9.29	4.07	2.53	-1.53	0.0177	0.0758	Unaltered group
TMEM45A	3q12.2	7.62	9.12	2.53	1.66	-1.51	0.000328	0.007363	Unaltered group
PGF	14q24.3	9.17	10.67	2.3	1.87	-1.5	0.0001113	0.004176	Unaltered group
HAVCR1	5q33.3	7.24	8.74	3.66	2.33	-1.5	0.0105	0.0542	Unaltered group
GBA3	4p15.2	8.27	9.77	3.71	2.26	-1.5	0.0111	0.0566	Unaltered group
ANK1	8p11.21	5.44	6.93	2.5	2.01	-1.49	0.0003423	0.007552	Unaltered group
NDNF	4q27	3.47	4.96	2.68	3.1	-1.49	0.001008	0.0134	Unaltered group
VSIG1	Xq22.3	4.24	5.72	2.39	1.65	-1.48	0.0002052	0.005793	Unaltered group
GGTLC2	22q11.22	7.11	8.59	3.11	1.53	-1.48	0.00311	0.0259	Unaltered group
PRAP1	10q26.3	5.96	7.44	3.61	2.79	-1.48	0.0108	0.0555	Unaltered group
PREX2	8q13.2	6.61	8.08	2.38	1.86	-1.47	0.000216	0.005961	Unaltered group
ACAN	15q26.1	7.87	9.34	2.39	1.71	-1.47	0.0002391	0.00619	Unaltered group
B3GNT4	12q24.31	4.92	6.39	2.52	1.69	-1.47	0.0004284	0.008403	Unaltered group
TMEM91	19q13.2	8.3	9.76	2.18	1.43	-1.46	6.85e-05	0.003391	Unaltered group
RASAL1	12q24.13	6.57	8.03	2.79	1.71	-1.46	0.001333	0.0159	Unaltered group
DNAJB13	11q13.4	3.6	5.06	2.79	2.68	-1.46	0.001552	0.0172	Unaltered group
HNF4A	20q13.12	8.04	9.5	3.54	2.19	-1.46	0.009736	0.0519	Unaltered group
RBP4	10q23.33	6.08	7.55	4.17	3.39	-1.46	0.0282	0.102	Unaltered group
GABRD	1p36.33	6.55	8	1.97	1.41	-1.45	1.791e-05	0.001779	Unaltered group
TGFA	2p13.3	9.98	11.43	2.4	1.3	-1.45	0.0002595	0.006485	Unaltered group
GLIS1	1p32.3	6	7.45	2.78	1.62	-1.45	0.001411	0.0163	Unaltered group
PPFIA4	1q32.1	7.13	8.58	3.18	1.72	-1.45	0.004563	0.0324	Unaltered group
SLC22A2	6q25.3	9.78	11.23	3.96	2.74	-1.45	0.0213	0.0851	Unaltered group
EPO	7q22.1	2.91	4.35	3.24	3.39	-1.44	0.006906	0.0421	Unaltered group
USH1C	11p15.1	9.64	11.08	3.73	1.93	-1.44	0.0148	0.0674	Unaltered group
AGXT2	5p13.2	7.78	9.22	4.06	2.47	-1.44	0.0252	0.0949	Unaltered group
CCN1	1p22.3	10.81	12.24	1.59	1.24	-1.43	4.68e-07	0.0004692	Unaltered group
IQSEC3	12p13.33	4.8	6.23	2.3	2.19	-1.43	0.0002296	0.00605	Unaltered group
MYH8	17p13.1	1.39	2.82	2.61	3.29	-1.43	0.001262	0.0153	Unaltered group
ENPEP	4q25	11.46	12.89	2.77	1.3	-1.43	0.001476	0.0167	Unaltered group
SLC7A9	19q13.11	6.36	7.79	3.24	1.97	-1.43	0.006141	0.0389	Unaltered group
CLDN2	Xq22.3	10.29	11.71	3.56	2.21	-1.43	0.0122	0.06	Unaltered group
HILPDA	7q32.1	10.34	11.76	2.24	1.33	-1.42	0.0001402	0.004692	Unaltered group
LINC00839	10q11.21	6.5	7.93	2.6	1.16	-1.42	0.0008155	0.0119	Unaltered group
EDN2	1p34.2	5.32	6.74	2.6	2.21	-1.42	0.0009536	0.0131	Unaltered group
PKP1	1q32.1	4.43	5.85	2.66	2.51	-1.42	0.001334	0.0159	Unaltered group
ESPN	1p36.31	6.12	7.55	2.81	1.82	-1.42	0.00191	0.0192	Unaltered group
CCL20	2q36.3	5.82	7.25	2.91	2.37	-1.42	0.002738	0.0239	Unaltered group
ACY3	11q13.2	7.43	8.85	3.24	1.71	-1.42	0.006122	0.0389	Unaltered group
HAO2	1p12	6	7.42	3.55	2.68	-1.42	0.013	0.0624	Unaltered group
TUBA3E	2q21.1	1.83	3.24	1.82	2.89	-1.41	1.734e-05	0.001779	Unaltered group
TRIM9	14q22.1	6.7	8.12	2.6	1.23	-1.41	0.0008704	0.0124	Unaltered group
TM4SF5	17p13.2	5.19	6.6	3.14	2.27	-1.41	0.005473	0.0362	Unaltered group
MGAT3	22q13.1	7.35	8.75	2.21	1.51	-1.4	0.0001623	0.005044	Unaltered group
MYH11	16p13.11	10.39	11.79	2.27	1.68	-1.4	0.0002318	0.006074	Unaltered group
HK2	2p12	9.47	10.86	2.39	1.09	-1.4	0.0003854	0.008066	Unaltered group
PNMA2	8p21.2	9.19	10.59	3.02	1.37	-1.4	0.003915	0.0295	Unaltered group
ANPEP	15q26.1	11.35	12.74	3.06	1.46	-1.4	0.004423	0.0319	Unaltered group
CGREF1	2p23.3	7.55	8.95	3.17	1.57	-1.4	0.005962	0.0384	Unaltered group
CXCL14	5q31.1	11.31	12.71	3.4	1.96	-1.4	0.01	0.053	Unaltered group
SLC39A5	12q13.3	7.47	8.87	3.7	2.47	-1.4	0.0179	0.0763	Unaltered group
ACE2	Xp22.2	8.16	9.56	3.94	2.81	-1.4	0.0253	0.0951	Unaltered group
SLC22A12	11q13.1	6.18	7.58	3.98	3.33	-1.4	0.0283	0.102	Unaltered group
TMEM38A	19p13.11	6.65	5.26	2.5	1.25	1.4	0.0006633	0.0108	Altered group
KBTBD12	3q21.3	2.69	1.29	3.31	1.42	1.4	0.008119	0.0466	Altered group
CALCA	11p15.2	1.93	0.54	3.58	1.38	1.4	0.0137	0.0645	Altered group
SMOC1	14q24.1	5.26	3.86	4.01	2.37	1.4	0.0274	0.101	Altered group
BDH1	3q29	7.59	6.16	2.53	1.47	1.42	0.0006192	0.0104	Altered group
TMEM255A	Xq24	7.57	6.14	3.22	2	1.43	0.005677	0.0371	Altered group
CTNNA2	2p12	2.09	0.66	3.22	1.29	1.44	0.005231	0.0352	Altered group
CEND1	11p15.5	3.89	2.43	2.59	1.31	1.46	0.0005741	0.009936	Altered group
DUSP15	20q11.21	6.22	4.77	3.06	1.69	1.46	0.003176	0.0262	Altered group
EPN3	17q21.33	3.54	2.08	3.3	1.96	1.46	0.005796	0.0376	Altered group
STAC2	17q12	5.67	4.21	3.99	3.31	1.46	0.0226	0.0885	Altered group
SPTBN2	11q13.2	6.81	5.32	3.44	2.52	1.49	0.007248	0.0436	Altered group
PPM1E	17q24.2	5.16	3.67	2.57	1.2	1.5	0.0004005	0.008221	Altered group
LRRTM1	2p12	2.03	0.53	3.09	1.4	1.5	0.002522	0.0227	Altered group
EPB41L4B	9q31.3	4.76	3.26	3.18	1.77	1.5	0.003405	0.0273	Altered group
SYT10	12p11.1	2.4	0.9	3.24	1.59	1.5	0.003916	0.0295	Altered group
ATP6V1B1	2p13.3	5.63	4.13	4.28	2.25	1.5	0.0264	0.0979	Altered group
FAXC	6q16.2	4.13	2.61	3	1.97	1.52	0.001934	0.0194	Altered group
NUPR2	7p11.2	2.17	0.66	3.58	1.48	1.52	0.007796	0.0455	Altered group
TOX3	16q12.1	6.82	5.28	2.43	2.59	1.54	0.0001948	0.005632	Altered group
GPR143	Xp22.2	6.92	5.38	3.41	2.24	1.54	0.005045	0.0344	Altered group
CLNK	4p16.1	2.83	1.29	3.81	1.54	1.54	0.0107	0.0549	Altered group
CLCNKA	1p36.13	5.02	3.45	3.99	2.33	1.57	0.0135	0.0638	Altered group
KLK3	19q13.33	1.99	0.41	3.16	1.31	1.58	0.001882	0.0191	Altered group
TFCP2L1	2q14.2	8.21	6.63	3.42	2.2	1.58	0.004278	0.0312	Altered group
FREM1	9p22.3	5.95	4.35	2.72	2.33	1.6	0.0004302	0.008403	Altered group
SLC4A1	17q21.31	4.85	3.23	4.43	2.75	1.62	0.0213	0.0851	Altered group
DEFB1	8p23.1	10.79	9.16	3.13	2.05	1.63	0.001451	0.0166	Altered group
SLC4A9	5q31.3	2.63	0.98	3.56	1.5	1.64	0.003964	0.0297	Altered group
FBN3	19p13.2	2.39	0.75	3.76	1.64	1.64	0.006349	0.0399	Altered group
SH3GL2	9p22.2	4.31	2.65	3.4	2.4	1.66	0.002775	0.0241	Altered group
CR1L	1q32.2	3.86	2.2	2.55	1.54	1.67	9.888e-05	0.004002	Altered group
TMEM61	1p32.3	3.55	1.85	3.58	1.91	1.7	0.003218	0.0265	Altered group
GALNT17	7q11.22	4.65	2.94	4.03	2.56	1.71	0.008258	0.0471	Altered group
CWH43	4p11	3.91	2.2	3.74	2.31	1.72	0.004451	0.032	Altered group
TJP3	19p13.3	4.8	3.07	3.05	2.05	1.73	0.0005934	0.0101	Altered group
CYP11A1	15q24.1	3.6	1.87	3.48	2.25	1.73	0.002294	0.0214	Altered group
CLDN8	21q22.11	3.09	1.35	4.73	2.27	1.74	0.0196	0.0808	Altered group
CKMT2	5q14.1	6.05	4.3	3.72	2.87	1.76	0.003711	0.0285	Altered group
HAGHL	16p13.3	6.91	5.12	2.47	2.04	1.79	2.432e-05	0.002056	Altered group
CKMT1B	15q15.3	4.84	3.04	4.17	2.61	1.79	0.007357	0.044	Altered group
CKMT1A	15q15.3	3.82	2.02	3.95	2.47	1.8	0.004714	0.033	Altered group
CLCNKB	1p36.13	5.51	3.68	4.66	2.56	1.83	0.0137	0.0644	Altered group
SYNGR3	16p13.3	5.05	3.2	2.84	1.56	1.84	0.0001029	0.004031	Altered group
HHATL	3p22.1	2.86	1	4.25	2.12	1.86	0.006153	0.039	Altered group
SLC26A7	8q21.3	5.74	3.87	4.2	1.94	1.87	0.005458	0.0361	Altered group
SFTPB	2p11.2	3.05	1.17	4.24	1.71	1.87	0.005626	0.0368	Altered group
INPP5J	22q12.2	6.52	4.64	3.37	1.56	1.88	0.0006563	0.0107	Altered group
FGF9	13q12.11	3.87	1.99	4.07	2.13	1.88	0.004125	0.0304	Altered group
FA2H	16q23.1	5.82	3.91	2.87	1.85	1.9	8.145e-05	0.003742	Altered group
CNTN3	3p12.3	4.55	2.65	3.45	2.26	1.9	0.0008112	0.0119	Altered group
TRIM50	7q11.23	3.86	1.96	3.57	1.57	1.9	0.001077	0.0139	Altered group
LCN2	9q34.11	4.34	2.43	3.51	2.32	1.91	0.0009237	0.0128	Altered group
STAP1	4q13.2	4.72	2.81	3.89	1.81	1.91	0.002422	0.0221	Altered group
SLC9A2	2q12.1	4.46	2.52	3.71	2.16	1.94	0.001371	0.0161	Altered group
PLA2G4F	15q15.1	3.33	1.37	4.16	2.1	1.96	0.003407	0.0273	Altered group
KLK15	19q13.33	2.25	0.28	3.74	1.33	1.97	0.001187	0.0149	Altered group
BSND	1p32.3	2.69	0.69	4.33	1.71	2	0.003909	0.0295	Altered group
HCN2	19p13.3	4.65	2.61	3.26	1.54	2.05	0.0001587	0.004978	Altered group
RHBG	1q22	3.25	1.2	4.37	2	2.05	0.003575	0.0279	Altered group
ATP6V1G3	1q31.3	2.67	0.62	4.71	1.77	2.05	0.00642	0.0402	Altered group
NMRK2	19p13.3	2.73	0.68	4.3	1.74	2.06	0.002937	0.025	Altered group
DMRT2	9p24.3	3.57	1.51	4.59	2.14	2.06	0.005052	0.0344	Altered group
PART1	5q12.1	3.06	0.95	4.03	1.71	2.11	0.001243	0.0152	Altered group
ATP6V0D2	8q21.3	5.7	3.57	5.1	2.64	2.13	0.008953	0.0492	Altered group
NR0B2	1p36.11	3.02	0.86	4.22	1.62	2.16	0.00155	0.0172	Altered group
KLK4	19q13.41	3.24	1.08	4.3	1.99	2.16	0.001907	0.0192	Altered group
ADGRF1	6p12.3	4.68	2.48	3.92	2.54	2.19	0.0006782	0.0109	Altered group
HEPACAM2	7q21.2	3.27	1.08	4.88	1.99	2.19	0.004991	0.0342	Altered group
GCGR	17q25.3	3.14	0.92	3.96	1.8	2.23	0.0005909	0.0101	Altered group
TMEM213	7q34	4.76	2.43	5.42	2.67	2.33	0.007021	0.0426	Altered group
FOXI1	5q35.1	3.64	1.27	5.16	2.37	2.38	0.004079	0.0302	Altered group
TMPRSS2	21q22.3	6.12	3.71	3.92	2.34	2.41	0.0002193	0.005967	Altered group
ATP6V0A4	7q34	4.85	2.39	5.71	2.85	2.46	0.007011	0.0425	Altered group
AQP6	12q13.12	4.6	2.11	4.54	2.09	2.49	0.0007821	0.0117	Altered group
KLK1	19q13.33	3.99	1.38	4.95	2.3	2.61	0.001177	0.0148	Altered group
CFTR	7q31.2	4.12	1.51	5.03	2.31	2.61	0.001367	0.0161	Altered group
PVALB	22q12.3	4.59	1.92	4.91	2.65	2.67	0.0008744	0.0124	Altered group
RHCG	15q26.1	5.03	1.98	5.45	2.69	3.05	0.0006302	0.0105	Altered group
